# Supplementary material for: Exploring Sustainable Food Choices Factors and Purchasing Behavior in the Sustainable Development Goals Era in Spain
Source: MDPI journal article supplement (doi:10.3390/su13137397), 2021-07-01
Supplement: s1 [file s1]

Archive with 1 entries (1 files):
- sustainability-1256992-supplementary.pdf
