# Supplementary material for: Exploring Sustainable Food Choices Factors and Purchasing Behavior in the Sustainable Development Goals Era in Spain
Source: MDPI journal article supplement (doi:10.3390/su13137397), 2021-07-01
Supplement: s1 [file s1 › sustainability-1256992-supplementary.pdf]

Article

# Exploring the alignment of current consumption patterns and sustainable food choices in the SDG era in Spain

## Exploring sustainable food choices factors and purchasing behaviour in the Sustainable Development Goals era in Spain

Isabel Blanco-Penedo<sup>1</sup>, Javier Garcia-Gudiño<sup>2</sup>, Elena Angón<sup>3</sup>, Jose Manuel Perea<sup>3</sup>, Alfredo J. Escribano<sup>4</sup>, Maria Font-i-Furnols<sup>5</sup>

<sup>1</sup> Department of Clinical Sciences, SLU, Uppsala SE-750 07, Sweden

<sup>2</sup> Animal Welfare Programme, IRTA, 17121 Monells, Spain; javier.garciag@juntaex.es

<sup>3</sup> Animal Production, UCO, 14071 Córdoba, Spain; eangon@uco.es (E.A.); pa2pemuj@uco.es (J.P)

<sup>4</sup> Independent Researcher & Consultant, 10005 Cáceres, Spain; ajesc@gmail.com

<sup>5</sup> Food Quality and Technology Program, IRTA, Monells 17121, Spain; maria.font@irta.cat

\* Correspondence: Isabel Blanco-Penedo isabel.blanco.penedo@slu.se

**Table S1.** Questionnaire and selected questions to perform the cluster analysis

| N. question                        | Question Description                                                                                                            |
|------------------------------------|---------------------------------------------------------------------------------------------------------------------------------|
| <b>KNOWLEDGE IN SUSTAINABILITY</b> |                                                                                                                                 |
| <b>P10</b>                         | <i>Have you ever heard of sustainability?</i>                                                                                   |
| <b>P11</b>                         | <i>What is the meaning for you of sustainability related to food? Indicate if you agree with the following statements:</i>      |
| P11_1                              | The integration of natural habitat conservation with the survival of the economic system                                        |
| P11_2                              | Be aware of the quality of life in daily consumption decisions                                                                  |
| P11_3                              | Ensure the health and welfare of animals                                                                                        |
| P11_4                              | Conservation and protection of water resources                                                                                  |
| P11_5                              | Reduction or elimination of pesticides and antibiotics in livestock and agriculture                                             |
| <b>P14</b>                         | <i>Indicate how much do you agree with the following statements:</i>                                                            |
| P14_8                              | I know the difference between an organic product and a natural, healthy or crop garden product                                  |
| <b>BELIEFS</b>                     |                                                                                                                                 |
| <b>P12</b>                         | <i>Taking into account sustainable food products, please indicate how much you agree with the following statements:</i>         |
| P12_12                             | I believe that sustainable food products are safer than conventional ones and of a higher quality                               |
| P12_34                             | Information on sustainable food is poor and confusing                                                                           |
| <b>P13</b>                         | <i>Indicate how much you agree with the following statements:</i>                                                               |
| P13_4                              | I think organic products are too expensive                                                                                      |
| P13_7                              | Pesticide residues in fruits and vegetables are harmful to human health                                                         |
| P13_89                             | GMOs and artificial flavors and additives are harmful to human health                                                           |
| <b>P14</b>                         | <i>Indicate how much you agree with the following statements:</i>                                                               |
| P14_3                              | I trust little brands in general                                                                                                |
| P14_4                              | I trust white labels                                                                                                            |
| <b>P19</b>                         | <i>Indicate how much you agree with the following statements:</i>                                                               |
| P19_3                              | Food from abroad is always better                                                                                               |
| <b>BEHAVIOUR</b>                   |                                                                                                                                 |
| <b>P13</b>                         | <i>Indicate how much you agree with the following statements:</i>                                                               |
| P13_16                             | I generally do not buy products that include preservatives, preferring to buy organic food                                      |
| P13_2                              | When I deal with new products, I don't usually look at the list of ingredients                                                  |
| <b>P14</b>                         | <i>Indicate how much you agree with the following statements:</i>                                                               |
| P14_1                              | I prefer to consume local products, that are grown or produced near where I live                                                |
| P14_2                              | I usually buy some fair trade products                                                                                          |
| P14_5                              | I do not buy brands or products produced or manufactured by companies that are not responsible with the environment and society |
| P14_6                              | I participate in protests against brands that are not respectful of the environment                                             |
| P14_7                              | I read the labels of the products carefully to know their ingredients, elaboration, contents, calories ...                      |
| P14_9                              | I eat organic food because it is the trend and they are fashionable                                                             |
| <b>P15</b>                         | <i>Indicate how much you agree with the following statements:</i>                                                               |
| P15_23                             | I try to follow a Mediterranean and traditional diet, avoiding prepared meals.                                                  |
| P15_45                             | I do more exercise for my health than for my look                                                                               |
| P15_6                              | When it comes to food, I'm always looking for something new                                                                     |
| P15_7                              | Every time I eat less meat and I focus on a more vegetarian diet                                                                |
| P15_8                              | I try to treat myself every day                                                                                                 |
| <b>P19</b>                         | <i>Indicate how much do you agree with the following statements:</i>                                                            |
| P19_12                             | I prefer food produced locally or from our country                                                                              |
| <b>RELEVANCE</b>                   |                                                                                                                                 |
| <b>P13</b>                         | <i>Indicate how much you agree with the following statements:</i>                                                               |
| P13_3                              | When I deal with new products, the brand is important to me                                                                     |
| P13_10                             | The taste of meals is more important than the ingredients                                                                       |
| P13_11                             | Food packaging is important to me                                                                                               |
| <b>P15</b>                         | <i>Indicate how much you agree with the following statements:</i>                                                               |
| P15_1                              | My diet and that of my family is very important to me                                                                           |
| <b>P17</b>                         | <i>Given the choice of food products, are the following factors important to you?</i>                                           |
| P17_1                              | Quality                                                                                                                         |
| P17_23                             | Health care and food safety                                                                                                     |
| P17_4                              | Origin in organic farming and livestock                                                                                         |
| P17_56                             | Produced locally or in the country                                                                                              |
| <b>P18</b>                         | <i>Indicate the importance of each of the following factors for you:</i>                                                        |
| P18_1234                           | Respect for the environment, recycling, preserve natural resources and sustainable production                                   |

**Table S2.** Characteristics of consumption habitude

|                              | <b>Global<sup>1</sup></b><br><b>n=401</b> | <b>Cluster 1</b><br><b>n=276</b> | <b>Cluster 2</b><br><b>n=125</b> |
|------------------------------|-------------------------------------------|----------------------------------|----------------------------------|
| <b>Consumption frequency</b> |                                           |                                  |                                  |
| Pork meat                    |                                           |                                  |                                  |
| Once or more weekly          | 69.58                                     | 73.91                            | 60.00                            |
| Once or more monthly         | 21.20                                     | 18.12                            | 28.00                            |
| Occasionally                 | 7.98                                      | 6.52                             | 11.20                            |
| Never                        | 1.25                                      | 1.45                             | 0.80                             |
| Iberian pork meat            |                                           |                                  |                                  |
| Once or more weekly          | 38.25                                     | 41.82                            | 30.40                            |
| Once or more monthly         | 39.50                                     | 41.09                            | 36.00                            |
| Occasionally                 | 20.50                                     | 16.73 <sup>B</sup>               | 28.80 <sup>A</sup>               |
| Never                        | 1.75                                      | 0.36                             | 4.80                             |
| Pork products                |                                           |                                  |                                  |
| Once or more weekly          | 75.31                                     | 75.74                            | 74.40                            |
| Once or more monthly         | 16.12                                     | 13.60                            | 21.60                            |
| Occasionally                 | 7.05                                      | 8.82 <sup>A</sup>                | 3.20 <sup>B</sup>                |
| Never                        | 1.51                                      | 1.84                             | 0.80                             |
| Iberian pork products        |                                           |                                  |                                  |
| Once or more weekly          | 52.00                                     | 56.36                            | 42.40                            |
| Once or more monthly         | 28.75                                     | 28.00                            | 30.40                            |
| Occasionally                 | 18.50                                     | 15.27                            | 25.60                            |
| Never                        | 0.75                                      | 0.36                             | 1.60                             |
| <b>Place of purchase</b>     |                                           |                                  |                                  |
| Meat and meat products       |                                           |                                  |                                  |
| Butcher's shop               | 59.33                                     | 67.17 <sup>a</sup>               | 44.12 <sup>b</sup>               |
| Supermarket butcher          | 53.00                                     | 53.03                            | 52.94                            |
| Packaged meat                | 40.00                                     | 33.84 <sup>B</sup>               | 51.96 <sup>A</sup>               |
| Others                       | 5.02                                      | 4.57                             | 5.88                             |
| Food                         |                                           |                                  |                                  |
| Food market                  | 46.63                                     | 55.07 <sup>a</sup>               | 28.00 <sup>b</sup>               |
| Local shop                   | 44.39                                     | 46.38                            | 40.00                            |
| Local grocery shop           | 79.80                                     | 79.35                            | 80.80                            |
| Agricultural Cooperative     | 10.72                                     | 10.87                            | 10.40                            |
| Gourmet shop                 | 10.97                                     | 11.96                            | 8.80                             |
| Large grocery store          | 44.64                                     | 42.75                            | 48.80                            |

Different superscripts indicate significant differences between Clusters: A, B: P <0.01 and a, b: P<0.05. <sup>1</sup>Two consumers were not considered in the clusters due to missing values in some of the segmentation questions.

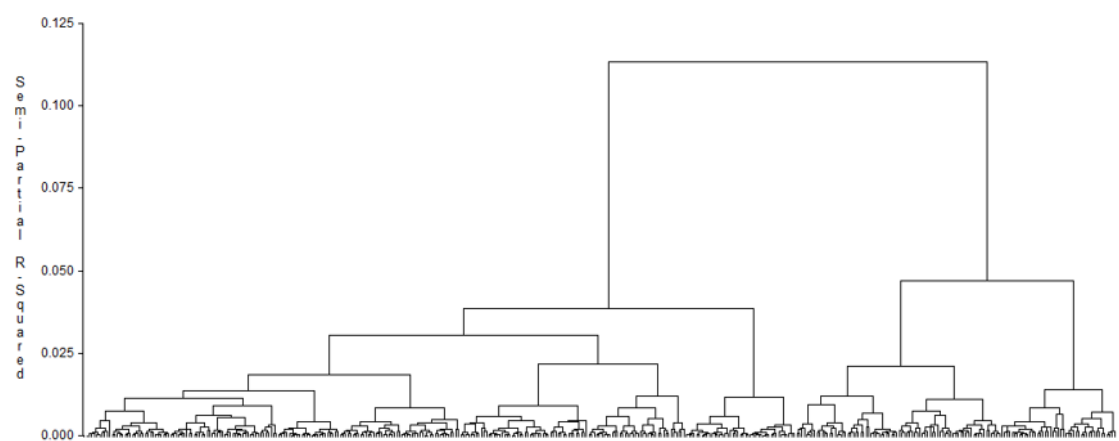

**Figure S1.** Dendrogram of the cluster analysis.
